# Supplementary material for: Thyroid Hemiagenesis: Incidence, Clinical Significance, and Genetic Background
Source: Oxford University Press journal article supplement (doi:10.1210/jc.2017-00784), 2017-06-28
Supplement: jc.2017-00784_Supplemental_Figure_Legend.doc [file jc.2017-00784_Supplemental_Figure_Legend.doc]

**Figure 4 (Supplementary material). Surgical removal of the hemiagenetic thyroid in a patient with multinodular goiter and left-sided thyroid hemiagenesis. The resected specimen on the right.**
